# Supplementary material for: Novel photo-induced deracemization of [Co(acac)3] (acac = acetylacetonate) with a chiral ruthenium(II) complex, Δ-[Ru(menbpy)3]2+ (menbpy = 4,4′-bis{(1R,2S,5R)-(−)-menthoxycarbonyl}-2,2′-bipyridine). Reaction mechanism and significant effects of solvent and anion †
Source: Royal Society of Chemistry journal article supplement (doi:10.1039/b009124n), 2001-01-01
Supplement: b009124n.pdf [file b009124n.pdf]

### Electronic supplementary information (ESI)

Novel Photo-induced Deracemization of  $[\text{Co}(\text{acac})_3]$  ( $\text{acac}^- = \text{acetylacetone}$ ) with a Chiral Ruthenium(II) Complex,  $\Delta\text{-}[\text{Ru}(\text{menbpy})_3]^{2+}$  ( $\text{menbpy} = 4,4'\text{-bis}\{(1R,2S,5R)\text{-(-)-menthoxy carbonyl}\}\text{-}2,2'\text{-bipyridine}$ ). Reaction Mechanism and Significant Effects of Solvent and Anion.

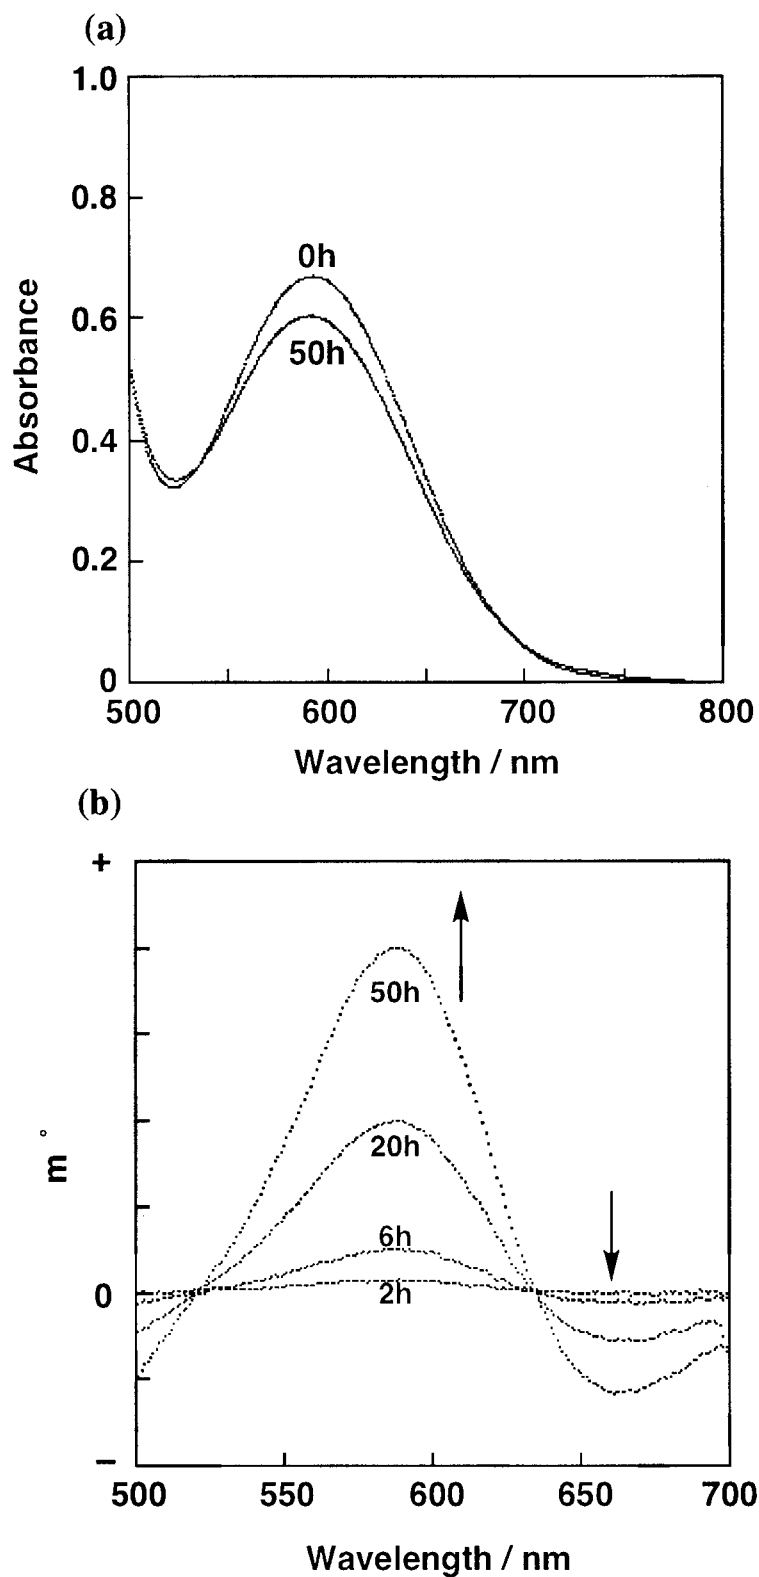

Figure. Absorption and CD spectral changes of the reaction solution.  $\Delta\text{-}[\text{Ru}(\text{menbpy})_3]^{2+} = 32 \mu\text{mol dm}^{-3}$ ,  $[\text{Co}(\text{acac})_3] = 5 \text{ mmol dm}^{-3}$ ,  $[\text{TEA}] = 0.5 \text{ mmol dm}^{-3}$  in acetonitrile- $\text{H}_2\text{O}$  (7:3 v/v) at 25 °C.
